# Supplementary material for: Lysosome purinergic receptor P2X4 regulates neoangiogenesis induced by microvesicles from sarcoma patients
Source: PubMed Central journal article supplement (PMC8371002; doi:10.1038/s41419-021-04069-w), 2021-08-17

HSP70

Tubulin

70KDa

—

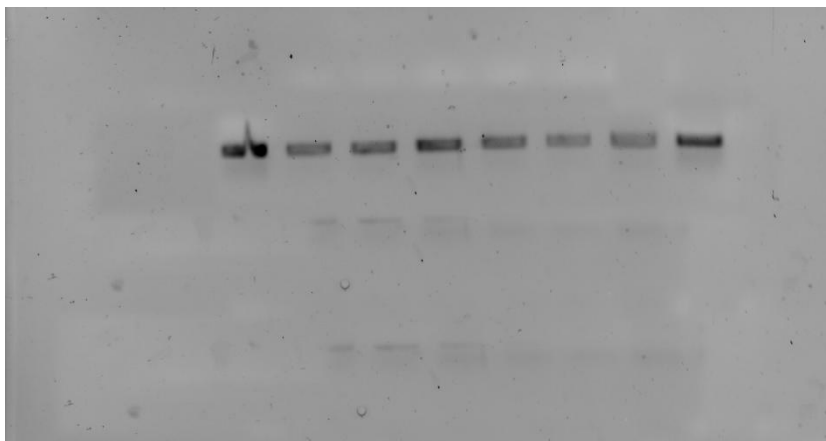

50KDa

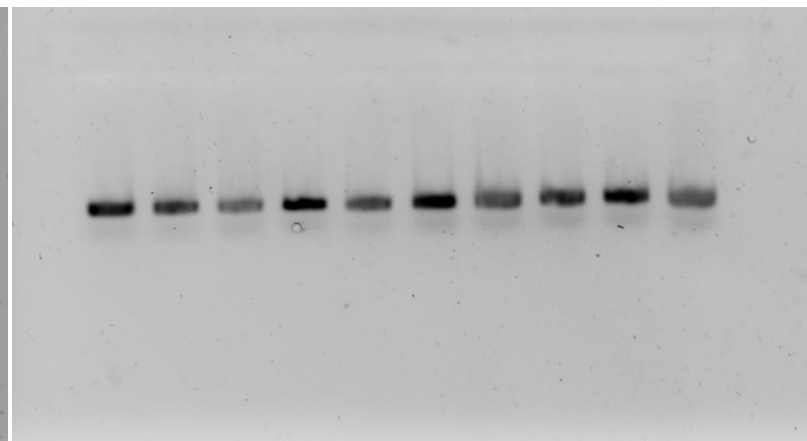

CD9

CD63

25KDa

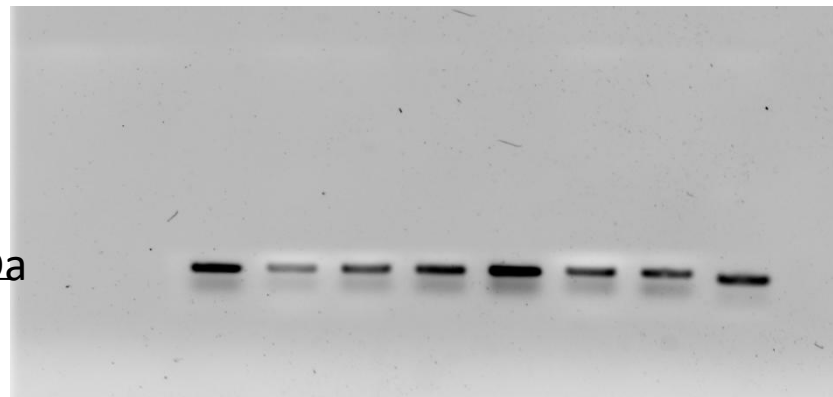

43KDa

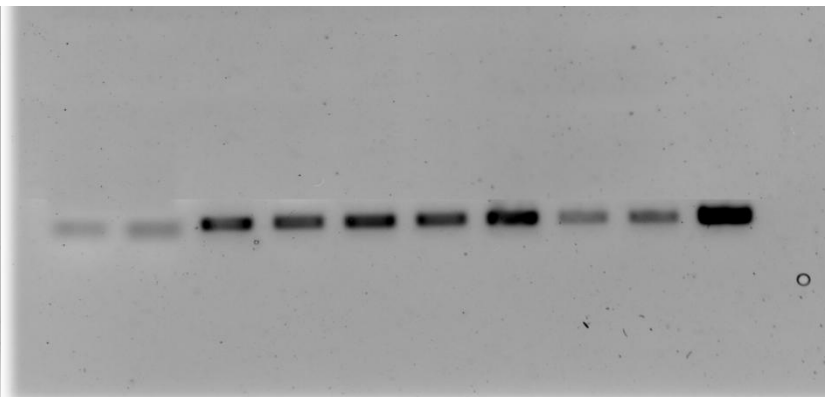

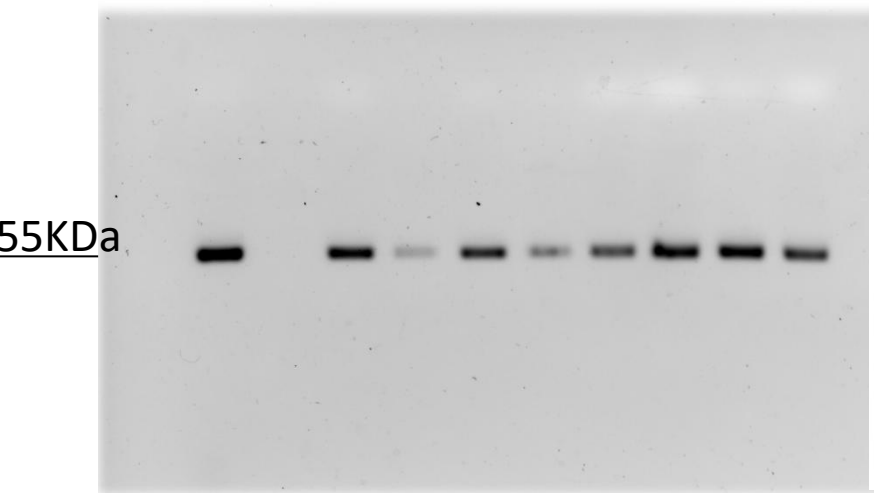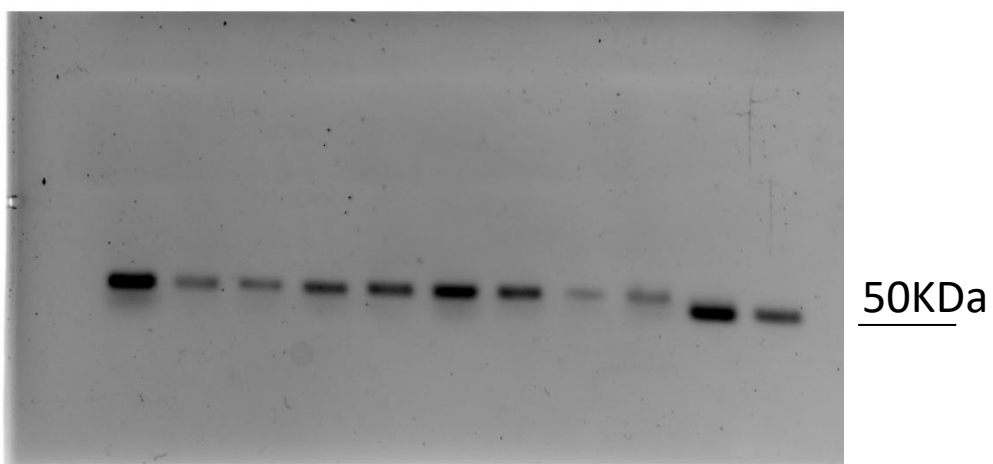

Supplement: 41419_2021_4069_MOESM14_ESM.pdf [file 41419_2021_4069_MOESM14_ESM.pdf]
